# Supplementary material for: Utilization of renewable bio-based resources, viz. sorbitol, diol, and diacid, in the preparation of two pack PU anticorrosive coatings
Source: Royal Society of Chemistry journal article supplement (doi:10.1039/c5ra17202k), 2016-01-01
Supplement: c5ra17202k1.pdf [file c5ra17202k1.pdf]

## **Utilization of renewable bio-based resources viz. sorbitol, diol, and diacid in the preparation of two pack PU anticorrosive coatings**

Abhijeet Anand<sup>1</sup>, Ravindra D. Kulkarni<sup>2</sup>, Chandrashekhar K. Patil<sup>1</sup>, Vikas V. Gite\*<sup>1</sup>

<sup>1</sup>School of Chemical Sciences, North Maharashtra University, Jalgaon - 425 001 (M. S.), India

<sup>2</sup>University Institute of Chemical Technology, North Maharashtra University, Jalgaon - 425 001 (M. S.),  
India

Email: [vikasgite123@gmail.com](mailto:vikasgite123@gmail.com)

**Table. S1.Characterization details of polyester polyol.**

| <b>Sr. No.</b> | <b>Diacid used in formulation</b> | <b>Reaction Step</b> | <b>Yield/ conversion (%)</b> | <b>Acid value</b> | <b>Hydroxyl value</b> |
|----------------|-----------------------------------|----------------------|------------------------------|-------------------|-----------------------|
| <b>1.</b>      | <b>Succinic</b>                   | <b>Ist</b>           | 94                           | 360               | 0                     |
|                |                                   | <b>IIInd</b>         | 86                           | 54                | 299                   |
|                |                                   | <b>IIIrd</b>         | 79                           | 10                | 170                   |
| <b>2.</b>      | <b>Adipic</b>                     | <b>Ist</b>           | 92                           | 354               | 0                     |
|                |                                   | <b>IIInd</b>         | 87                           | 51                | 293                   |
|                |                                   | <b>IIIrd</b>         | 80                           | 9.8               | 163                   |
| <b>3.</b>      | <b>Suberic</b>                    | <b>Ist</b>           | 93                           | 338               | 0                     |
|                |                                   | <b>IIInd</b>         | 85                           | 48                | 280                   |
|                |                                   | <b>IIIrd</b>         | 77                           | 10                | 157                   |
| <b>4.</b>      | <b>Sebacic</b>                    | <b>Ist</b>           | 92                           | 345               | 0                     |
|                |                                   | <b>IIInd</b>         | 83                           | 52                | 287                   |
|                |                                   | <b>IIIrd</b>         | 78                           | 10                | 168                   |

**Table. S2.Relative frequencies of functional groups present in FT-IR of polyester polyol.**

| <b>Sr. No.</b> | <b>Functional group</b>                          | <b>Relative frequency (cm<sup>-1</sup>)</b> |                    |                     |                     |
|----------------|--------------------------------------------------|---------------------------------------------|--------------------|---------------------|---------------------|
|                |                                                  | <b>Succinic acid</b>                        | <b>Adipic acid</b> | <b>Suberic acid</b> | <b>Sebacic acid</b> |
| <b>1.</b>      | -OH                                              | 3409                                        | 3418               | 3417                | 3413                |
| <b>2.</b>      | >CO                                              | 1734                                        | 1731               | 1732                | 1732                |
| <b>3.</b>      | -CH <sub>3</sub> , -CH <sub>2</sub> - stretching | 2925, 2850                                  | 2925, 2855         | 2927, 2857          | 2925, 2855          |
| <b>4.</b>      | -CH <sub>2</sub> - bending                       | 1463, 1377                                  | 1462, 1377         | 1462, 1361          | 1463, 1377          |

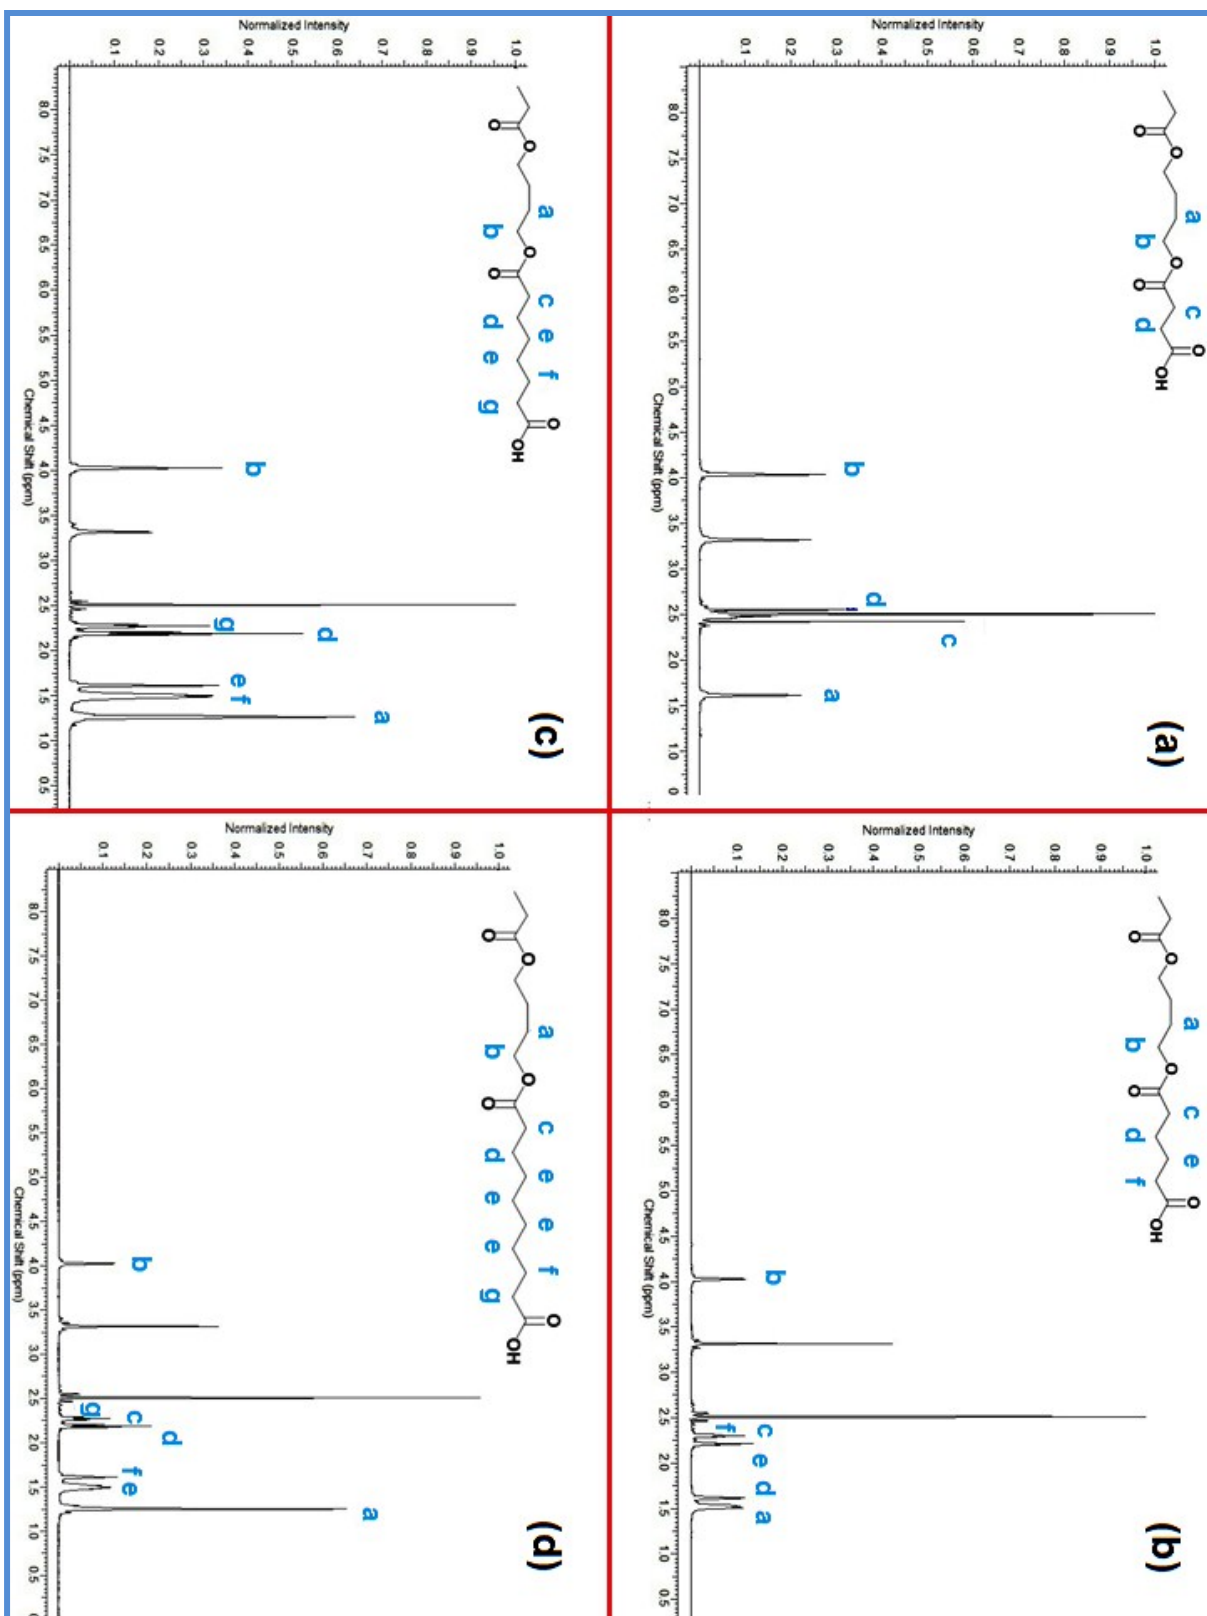

Fig. S1. NMR of polyester polyol (first intermediate product based on (a) succinic, (b) adipic, (c) suberic, and (d) sebacic acid).

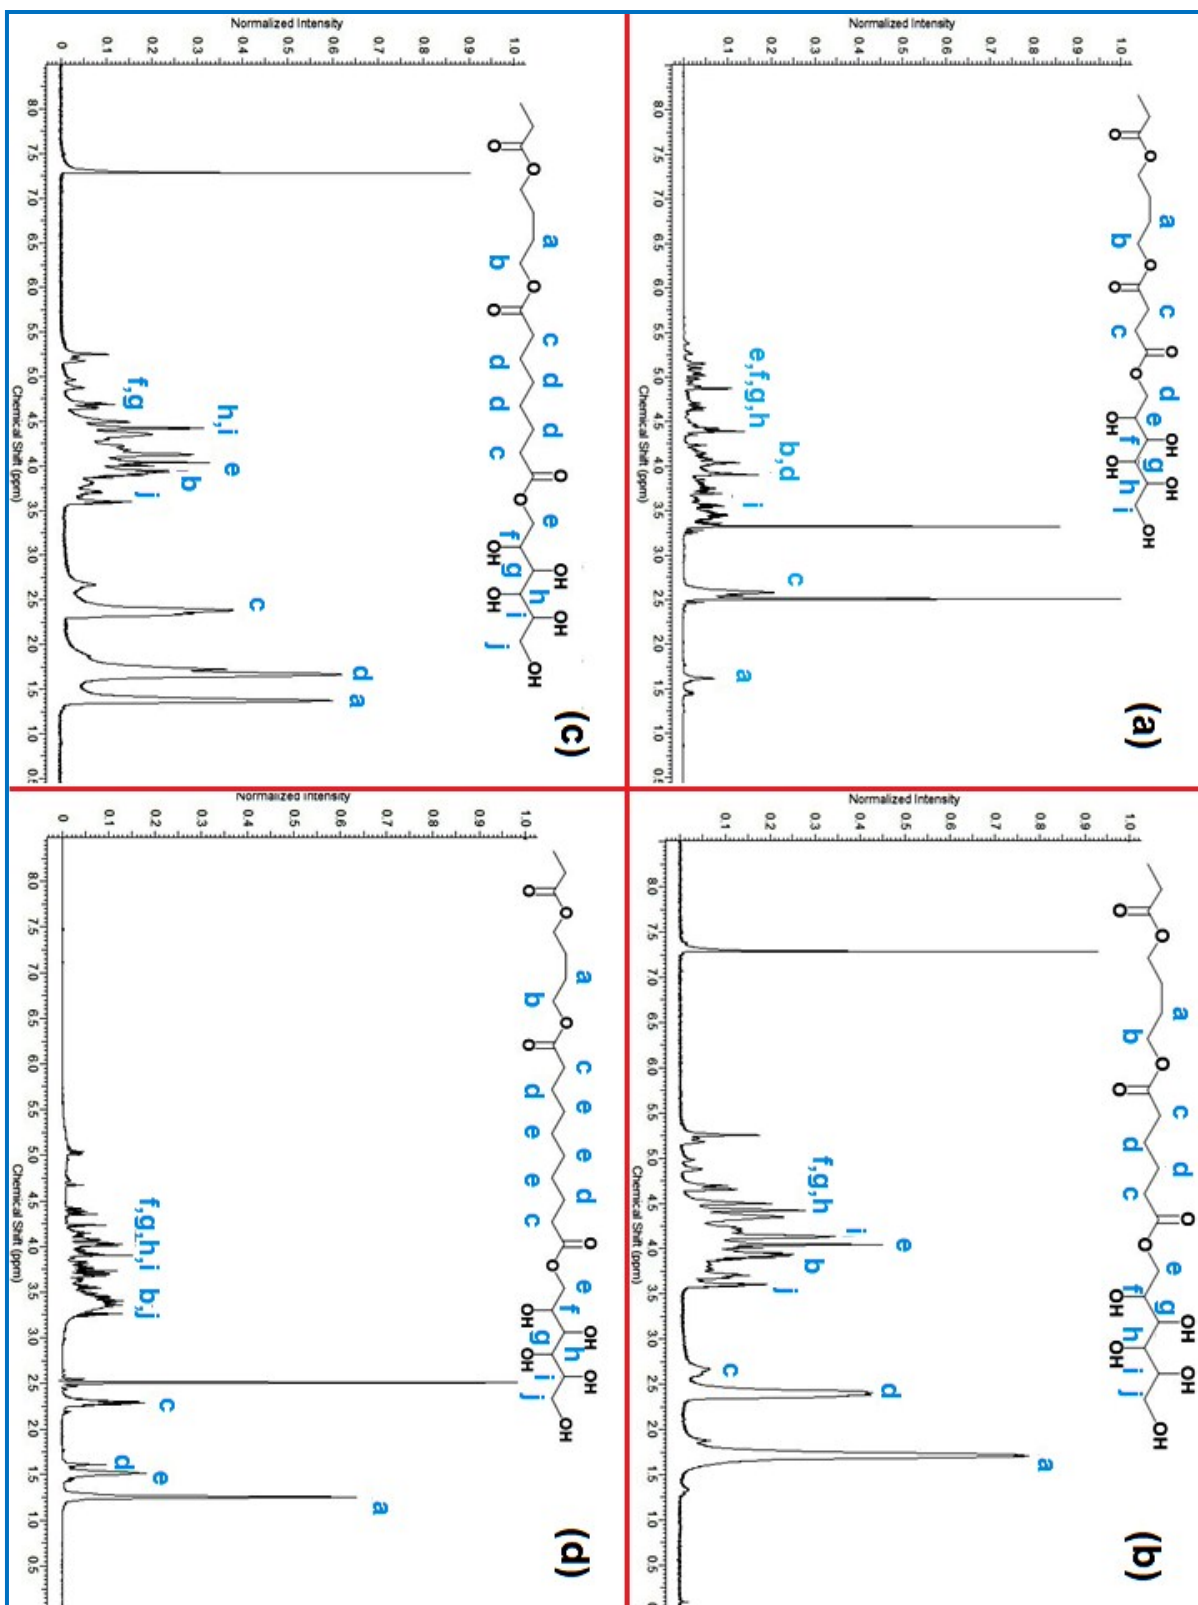

Fig. S2. NMR of polyester polyol (second intermediate product based on (a) succinic, (b) adipic, (c) suberic, and (d) sebacic acid).

Table. S3. Physical properties of polyester polyol

| Physical properties / formulation | Polyester polyol comprises of difunctional acid |             |              |              |
|-----------------------------------|-------------------------------------------------|-------------|--------------|--------------|
|                                   | Succinic acid                                   | Adipic acid | Suberic acid | Sebacic acid |
| Colour                            | Light brown                                     | Light brown | Light brown  | Light brown  |
| Mw                                | 2997                                            | 2582        | 2943         | 3462         |
| PDI                               | 1.886                                           | 2.807       | 2.819        | 4.181        |

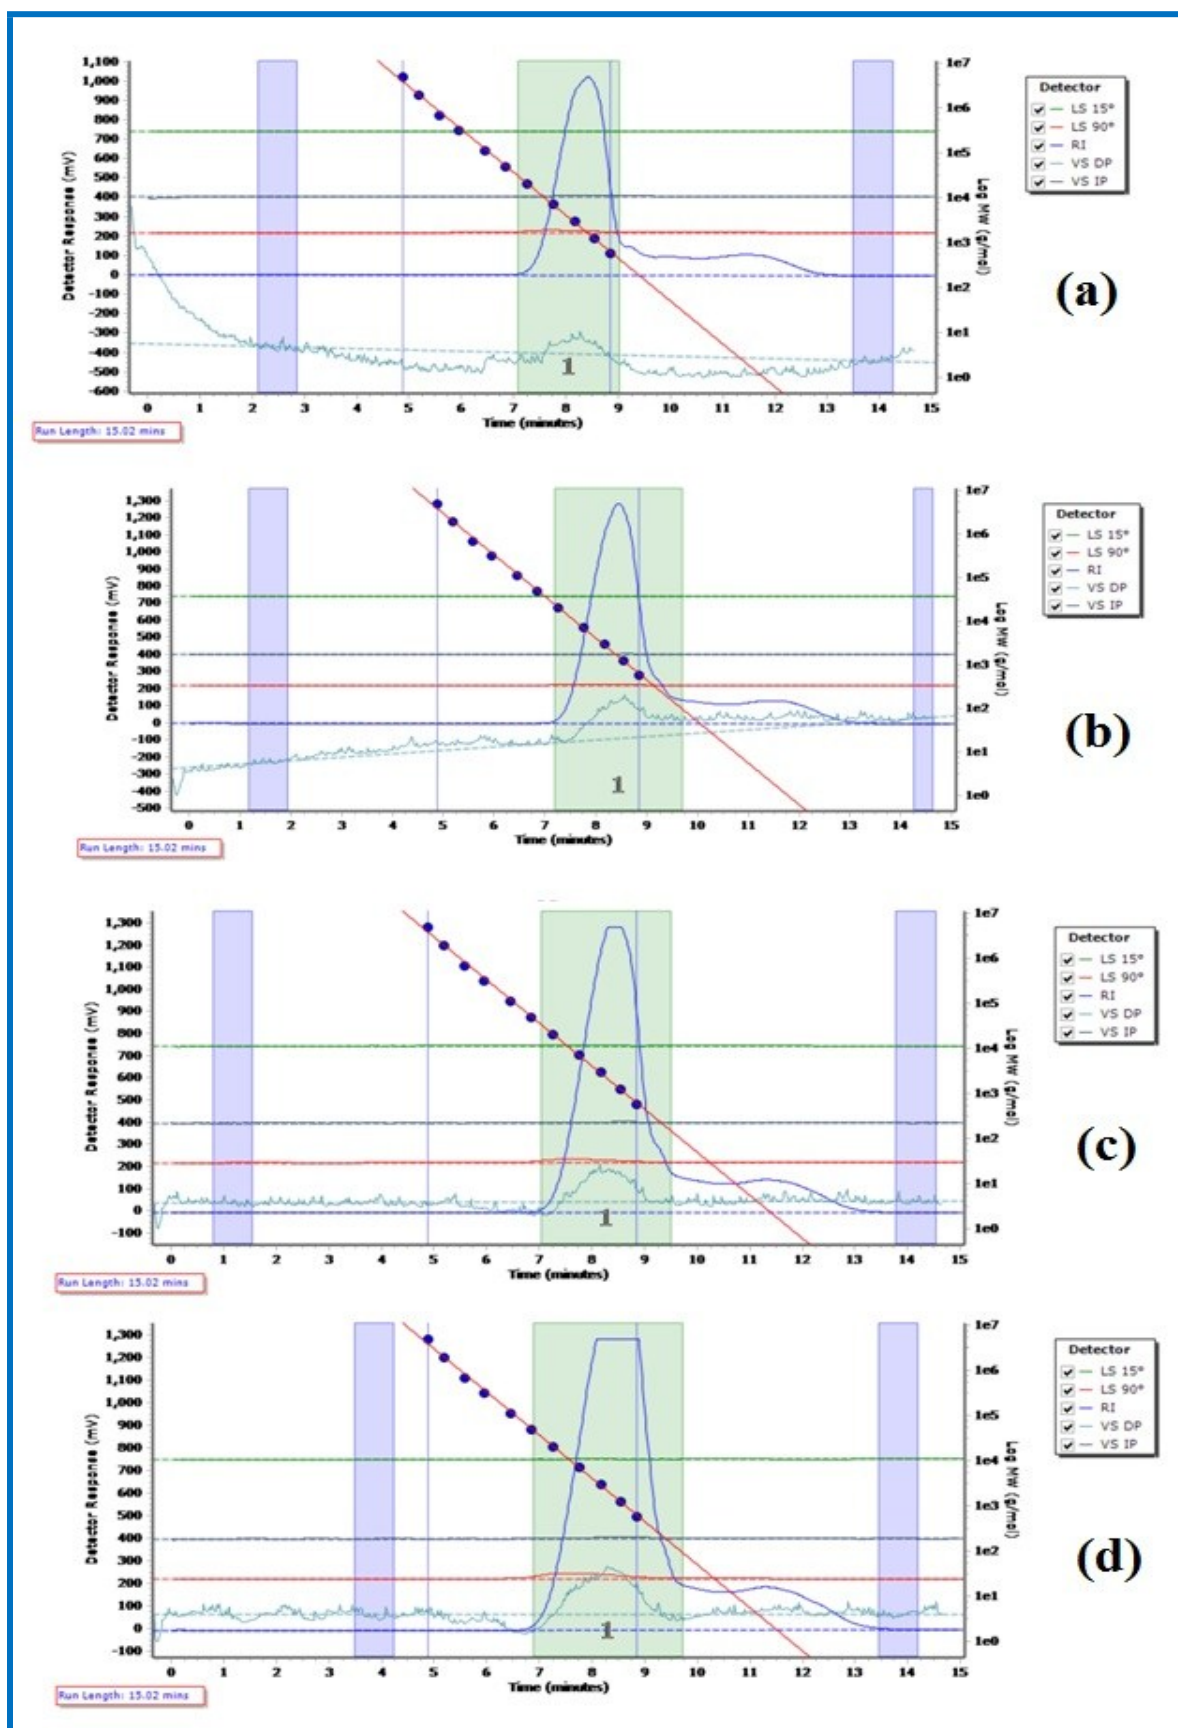

Fig. S3. GPC curve of polyester polyols prepared from sorbitol and difunctional acids *viz.* – (a) succinic, (b) adipic, (c) suberic, and (d) sebacic acid.

**Table. S4.Coating properties of PU formulations**

| <b>Prop./PU coatings</b> | <b>PU formulation comprises of difunctional acid</b> |                    |                     |                     |
|--------------------------|------------------------------------------------------|--------------------|---------------------|---------------------|
|                          | <b>Succinic acid</b>                                 | <b>Adipic acid</b> | <b>Suberic acid</b> | <b>Sebacic acid</b> |
| <b>Gloss</b>             | 98.4                                                 | 99.7               | 107.3               | 110.4               |
| <b>Bending test</b>      | Pass                                                 | Pass               | Pass                | Pass                |
| <b>Adhesion test</b>     | 100 %                                                | 100 %              | 100 %               | 100 %               |
| <b>Pencil hardness</b>   | 4H                                                   | 4H                 | 5H                  | 6H                  |
| <b>Mar resistance</b>    | 200                                                  | 400                | 800                 | 800                 |

**Table. S5. Electrochemical study for corrosion measurement in PU coatings**

|                 | <b>E<sub>corr</sub></b> | <b>I<sub>corr</sub></b> | <b>CR(myr)</b> |
|-----------------|-------------------------|-------------------------|----------------|
| <b>Blank</b>    | -1.004                  | 3.738                   | 9.216          |
| <b>Succinic</b> | -0.909                  | 2.87                    | 3.268          |
| <b>Adipic</b>   | -0.874                  | 2.563                   | 3.103          |
| <b>Suberic</b>  | -0.85                   | 1.222                   | 2.536          |
| <b>Sebacic</b>  | -0.828                  | 1.11                    | 2.127          |

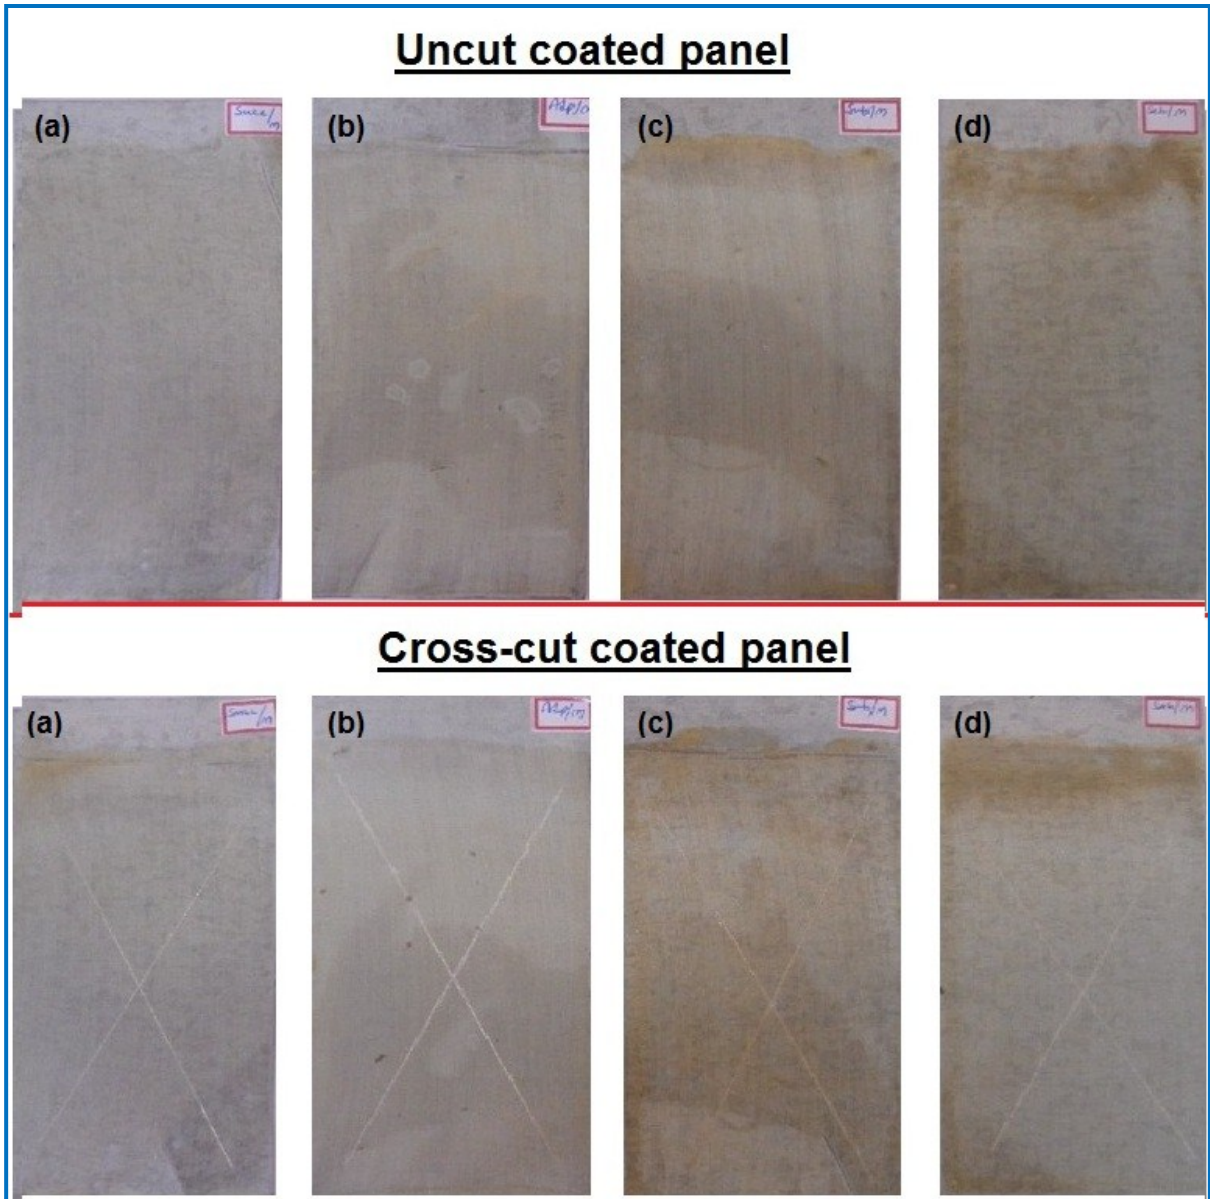

**Fig.S4. Images (before corrosion test) of PU coatings based on (a) succinic, (b) adipic, (c) suberic, and (d) sebacic acid.**

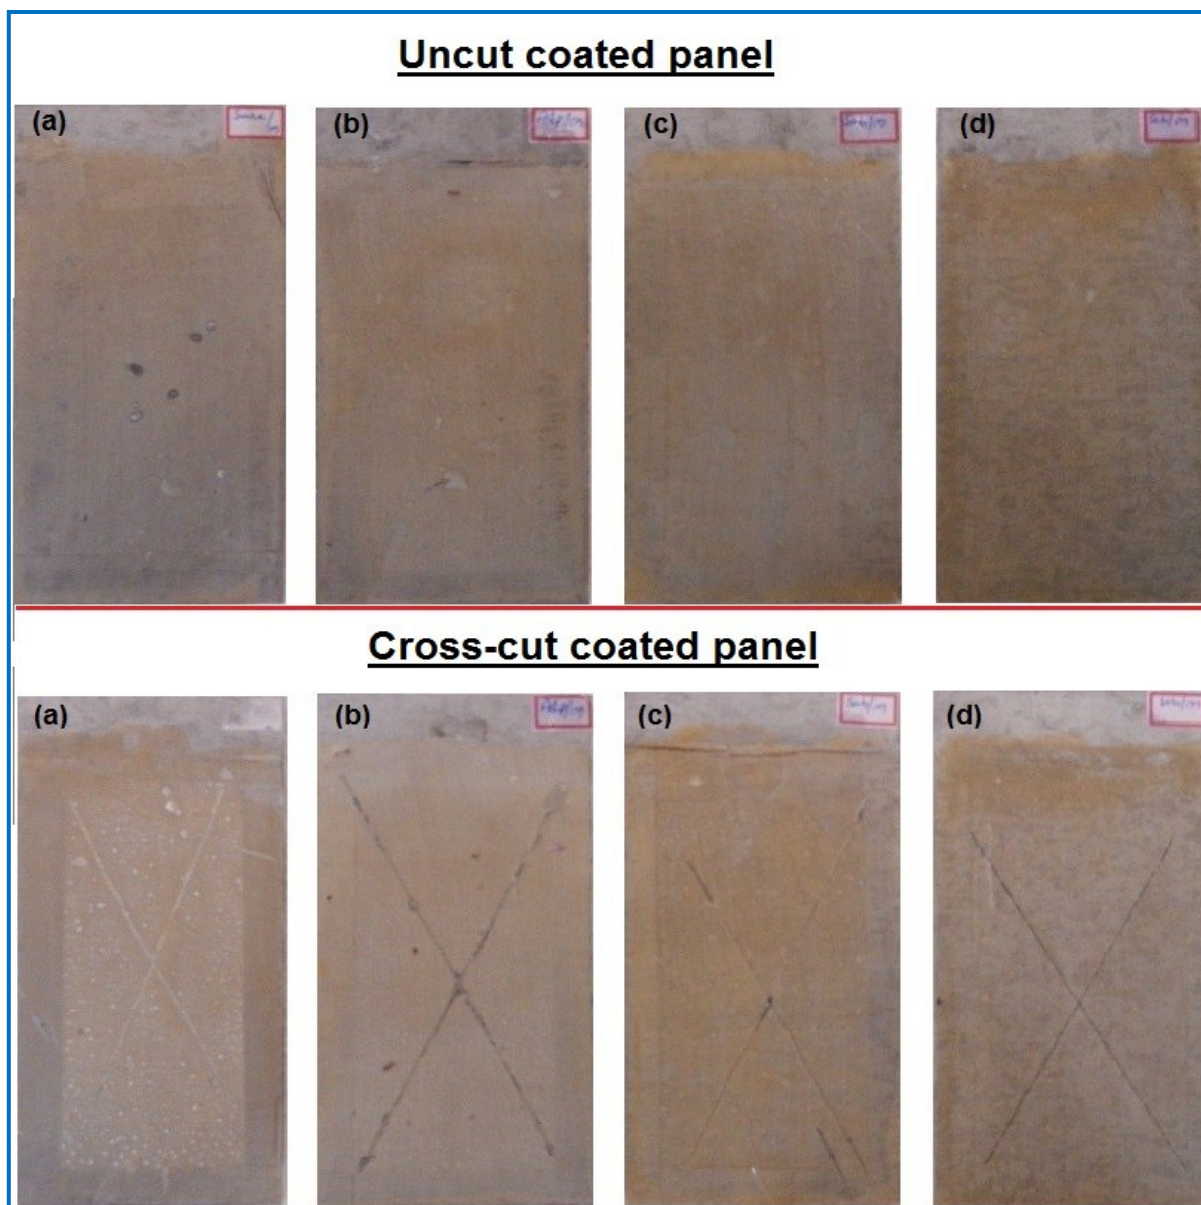

**Fig.S5. Images (after 72 h of corrosion test) of PU coatings based on (a) succinic, (b) adipic, (c) suberic, and (d) sebacic acid.**
